# Supplementary material for: A novel method for calculating ambient aerosol liquid water contents based on measurements of a humidified nephelometer system
Source: Copernicus journal article supplement (doi:10.5194/amt-2017-330), 2017-10-27
Supplement: Supplementary file 1 [file amt-2017-330-supplement.pdf]

---

1 **A novel method for calculating ambient**  
2 **aerosol liquid water contents based on**  
3 **measurements of a humidified**  
4 **nephelometer system**

5 **Ye Kuang<sup>1,2</sup>, ChunSheng Zhao<sup>1</sup>, Gang Zhao<sup>1</sup>, JiangChuan Tao<sup>1,2</sup>, Nan Ma<sup>2</sup>,**  
6 **YuXuan Bian<sup>3</sup>**

7 [1]{Department of Atmospheric and Oceanic Sciences, School of Physics, Peking  
8 University, Beijing, China}

9 [2]{Institute for Environmental and Climate Research, Jinan University, Guangzhou  
10 511443, China}

11 [3]{State Key Laboratory of Severe Weather, Chinese Academy of Meteorological  
12 Sciences}

13

14 Correspondence to: C. S. Zhao ([zcs@pku.edu.cn](mailto:zcs@pku.edu.cn))

15

16

17

18

19

---

20 **1.1 Field campaigns**

21 Datasets from five field campaigns are used in this paper. These campaigns are  
22 conducted at three locations on the North China Plain (NCP) during different time  
23 periods. The three locations are Wangdu (WD) and Xianghe (XH) in Heibei province  
24 and Wuqing (WQ) in Tianjin, and shown in Fig.S1. These three sites are background  
25 sites of the NCP. Time periods and locations of these filed campaigns are listed in Table  
26 S1.

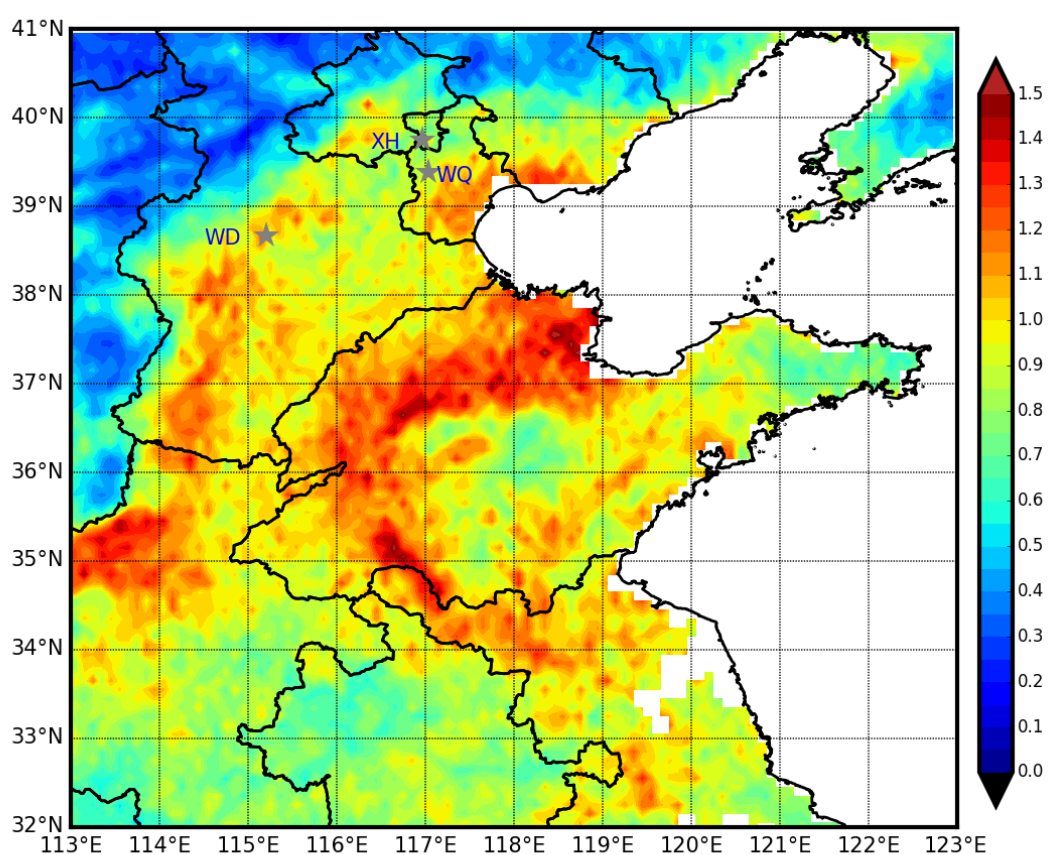

**Figure S1.** Locations of sites are marked with star markers. Colors represent average distribution of aerosol optical depth at 550 nm during summer from 2012 to 2014. The dataset of aerosol optical depth at 550 nm is from Moderate Resolution Imaging Spectroradiometer onboard satellite Aqua.

27

28

29

30

**Table S1.** Locations and time periods of fived field campaigns

| Campaign name | Location | Time periods               |
|---------------|----------|----------------------------|
| F1            | Wuqing   | 7 march to 4 April, 2009   |
| F2            | Wuqing   | 12 July to 14 August, 2009 |
| F3            | Xianghe  | 22 July to 30 August, 2012 |
| F4            | Xianghe  | 9 July to 8 August, 2013   |
| F5            | Wangdu   | 4 June to 14 July, 2014    |

31

32 During campaign F5, a humidified nephelometer system are available for measuring  
33  $\sigma_{sp}$  of aerosol particles in dry state and  $f(RH)$ . This humidified nephelometer system  
34 consists of two nephelometers (TSI Inc., Model 3563) and a humidifier. After passing  
35 through a dryer which is capable of reducing the RH of the sample air to lower than  
36 30 %, the sample air was pumped into different instruments. The total and back  
37 scattering coefficients in the dry state were measured by the first nephelometer (Neph1).  
38 After passing through Neph1, the aerosol particles passed through a humidifier which  
39 humidified the sample air through a Gore-Tex tube. The water vapor penetrates through  
40 the Gore-Tex tube, which is surrounded by a circulating water layer in a stainless steel  
41 tube. The temperature cycle of the circulating water layer was specified and controlled  
42 by a water bath. Next, the total and back scattering coefficients at certain RH points  
43 were measured by the second nephelometer (Neph2). Two combined RH and  
44 temperature sensors (Vaisala HMP110; accuracy of  $\pm 0.2$  °C and  $\pm 1.7$  % for RH  
45 ranges from 0 to 90 %, respectively, and accuracy of  $\pm 2.5$  % for RH ranges from  
46 90 % to 100 % according to the manufacturer) are placed at the inlet and outlet of  
47 Neph2, and the measured RHs and temperatures are defined as  $RH_1/T_1$  and  $RH_2/T_2$ ,  
48 respectively. The dew points at the inlet and outlet of Neph2 are calculated using the  
49 measured  $RH_1/T_1$  and  $RH_2/T_2$ , and the average value is considered the dew point of  
50 the sample air. The sample RH can then be calculated through the derived dew point,  
51 and the sample temperature is measured by the sensor inside the sample cavity of the  
52 nephelometer. Measurements from the humidified nephelometer system were only  
53 available from 21 June, 2014, to 1 July , 2014.
